# Supplementary material
Source: MDPI journal article supplement (https://www.mdpi.com/2504-477X/5/1/11)
Supplement: s1 [file s1]

# Supplementary Information: Nanocellulose from Unbleached Hemp Fibers as a Filler for Biobased Photocured Composites with Epoxidized Cardanol

Sara Dalle Vacche <sup>1,\*</sup>, Vijayaletchumy Karunakaran <sup>1,2</sup>, Silvia Maria Ronchetti <sup>1</sup>, Alessandra Vitale <sup>1</sup> and Roberta Bongiovanni <sup>1</sup>

<sup>1</sup> Department of Applied Science and Technology, Politecnico di Torino, Corso Duca degli Abruzzi 24, 10129 Torino, Italy; (A.V.) alessandra.vitale@polito.it; (R.B.) roberta.bongiovanni@polito.it

<sup>2</sup> Universiti Kuala Lumpur Malaysian Institute of Chemical and Bioengineering Technology (UniKL MICET), Lot 1988 Kawasan Perindustrian Bandar Vendor, Taboh Naning, Alor Gajah, Melaka, 78000 Malaysia;

\* Correspondence: sara.dallevacche@polito.it; Tel.: +39-011-090-4565

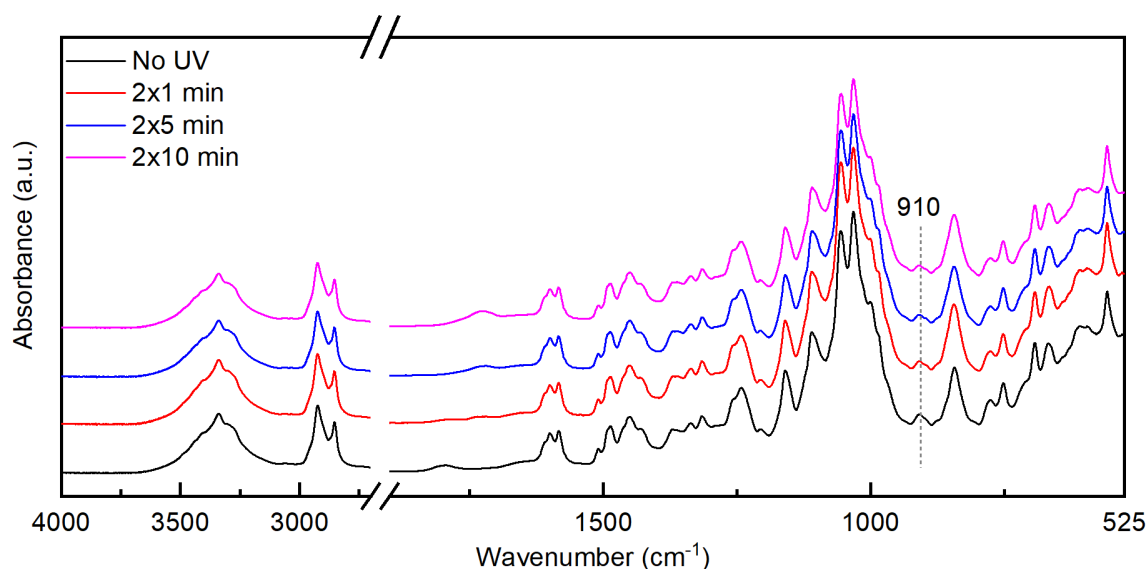

**Figure S1.** FTIR spectra of composites with 10% PI, uncured (No UV) and cured for  $2 \times 1$  min,  $2 \times 5$  min,  $2 \times 10$  min.

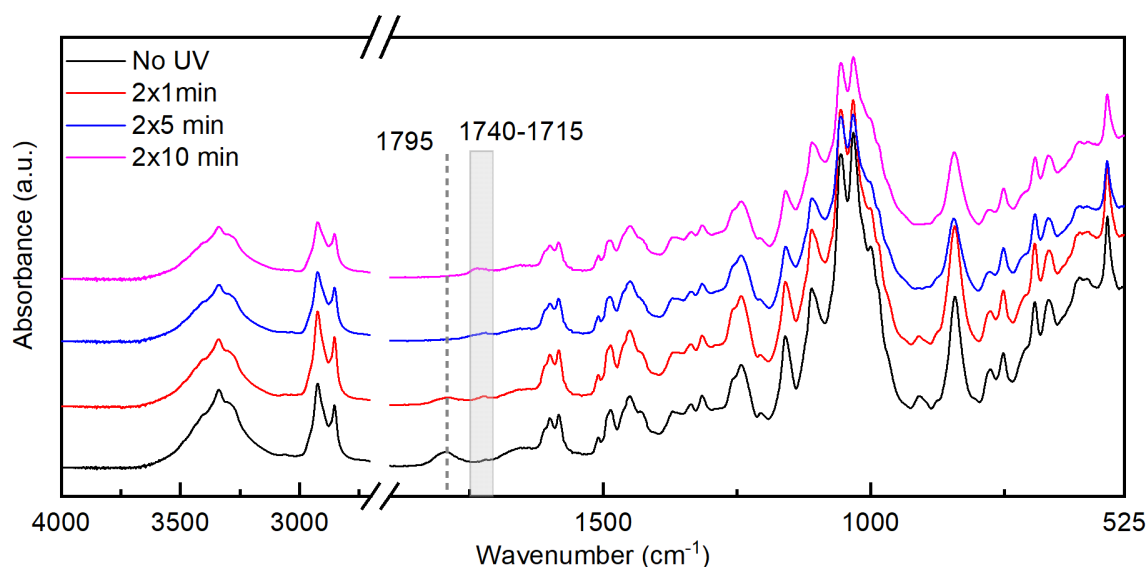

**Figure S2.** FTIR spectra of composites with 15% PI, irradiated under  $N_2$  flux.
